# Supplementary material for: Characterizing DPPM inhibition of butyrylcholinesterase: integrated enzymatic kinetics and Raman spectroscopy with chemometric analysis
Source: Royal Society of Chemistry journal article supplement (doi:10.1039/d5an01018g), 2025-11-21

## Supporting Information S1

The enzyme kinetic parameters reported in the main manuscript were determined from progress curves obtained from two independent experiments. Each experiment monitored the butyrylcholinesterase (BChE)-catalyzed hydrolysis of butyrylthiocholine (BTCh) at multiple substrate concentrations in the presence and absence of DPPM inhibitor. The absorbance at 412 nm, corresponding to the formation of 5-thio-2-nitrobenzoic acid (TNB) product via Ellman's reaction, was continuously monitored as a function of time. Absorbance measurements recorded every 30 seconds for approximately 10 minutes. Each condition was performed in triplicate; data shown represent mean values. Legend: 0.1T through 1T = control enzyme at indicated substrate concentration in mM; 0.1D through 1D = DPPM-inhibited enzyme at indicated substrate concentration in mM.

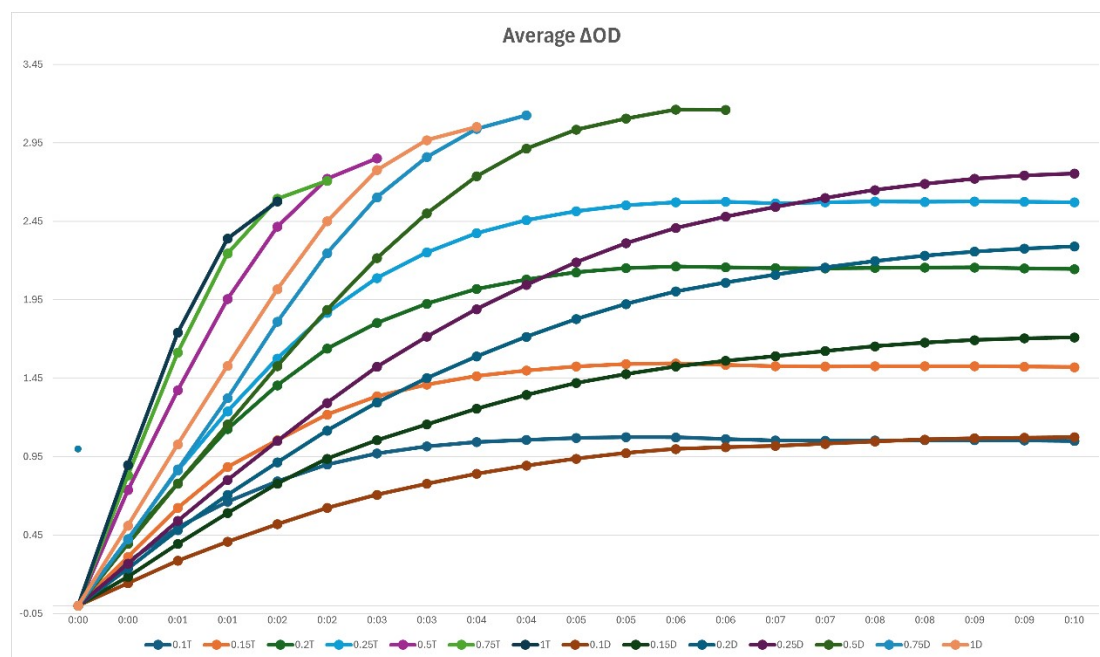

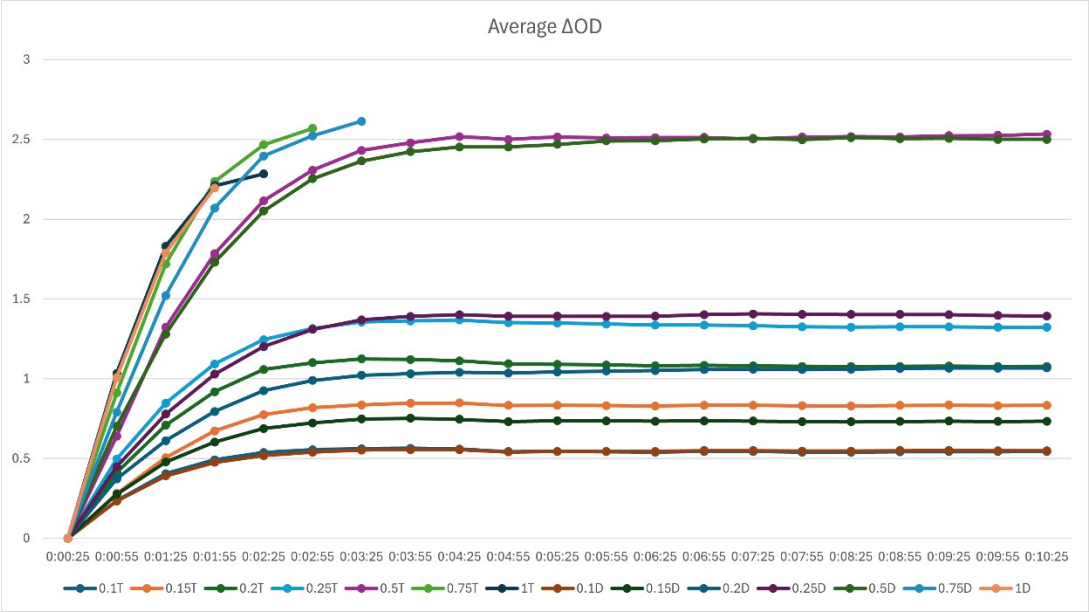

Supplement: d5an01018g1.pdf [file d5an01018g1.pdf]
